# Supplementary material
Source: PubMed Central journal article supplement (PMC11032747)

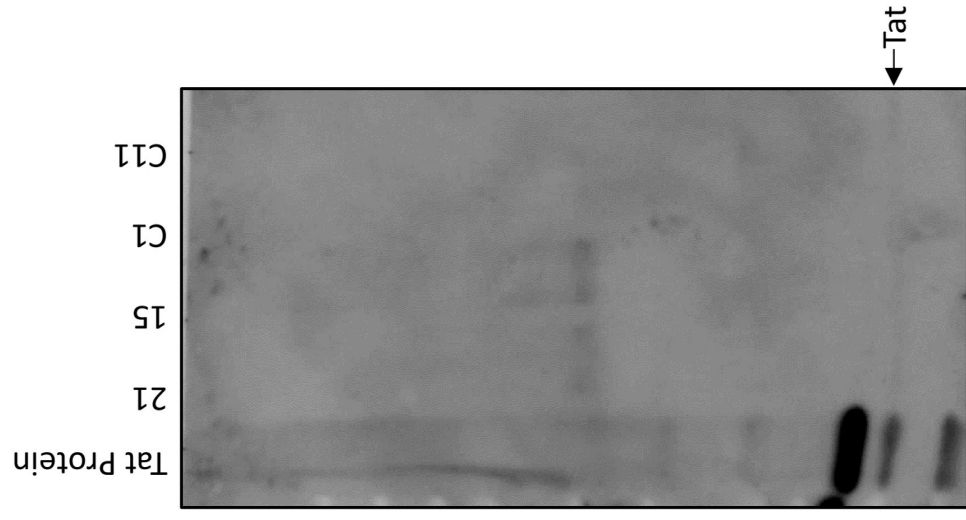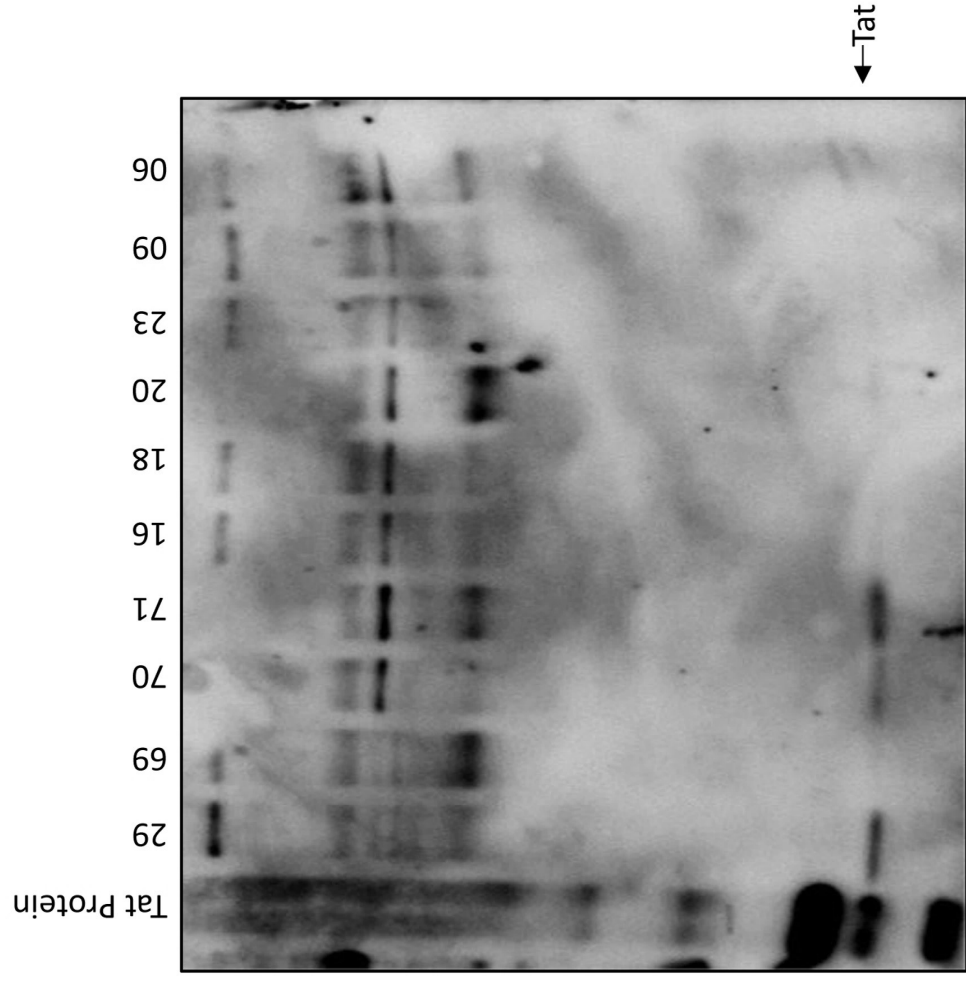

Supplementary Figure 2.

Supplement: NIHMS1928056-supplement-6.pdf [file NIHMS1928056-supplement-6.pdf]
